# Supplementary material
Source: publisher site journal article supplement (https://www.dovepress.com/get_supplementary_file.php?f=227883.docx)
Supplement: Supplementary file 1 [file get_supplementary_file.php]

**Supplementary materials**


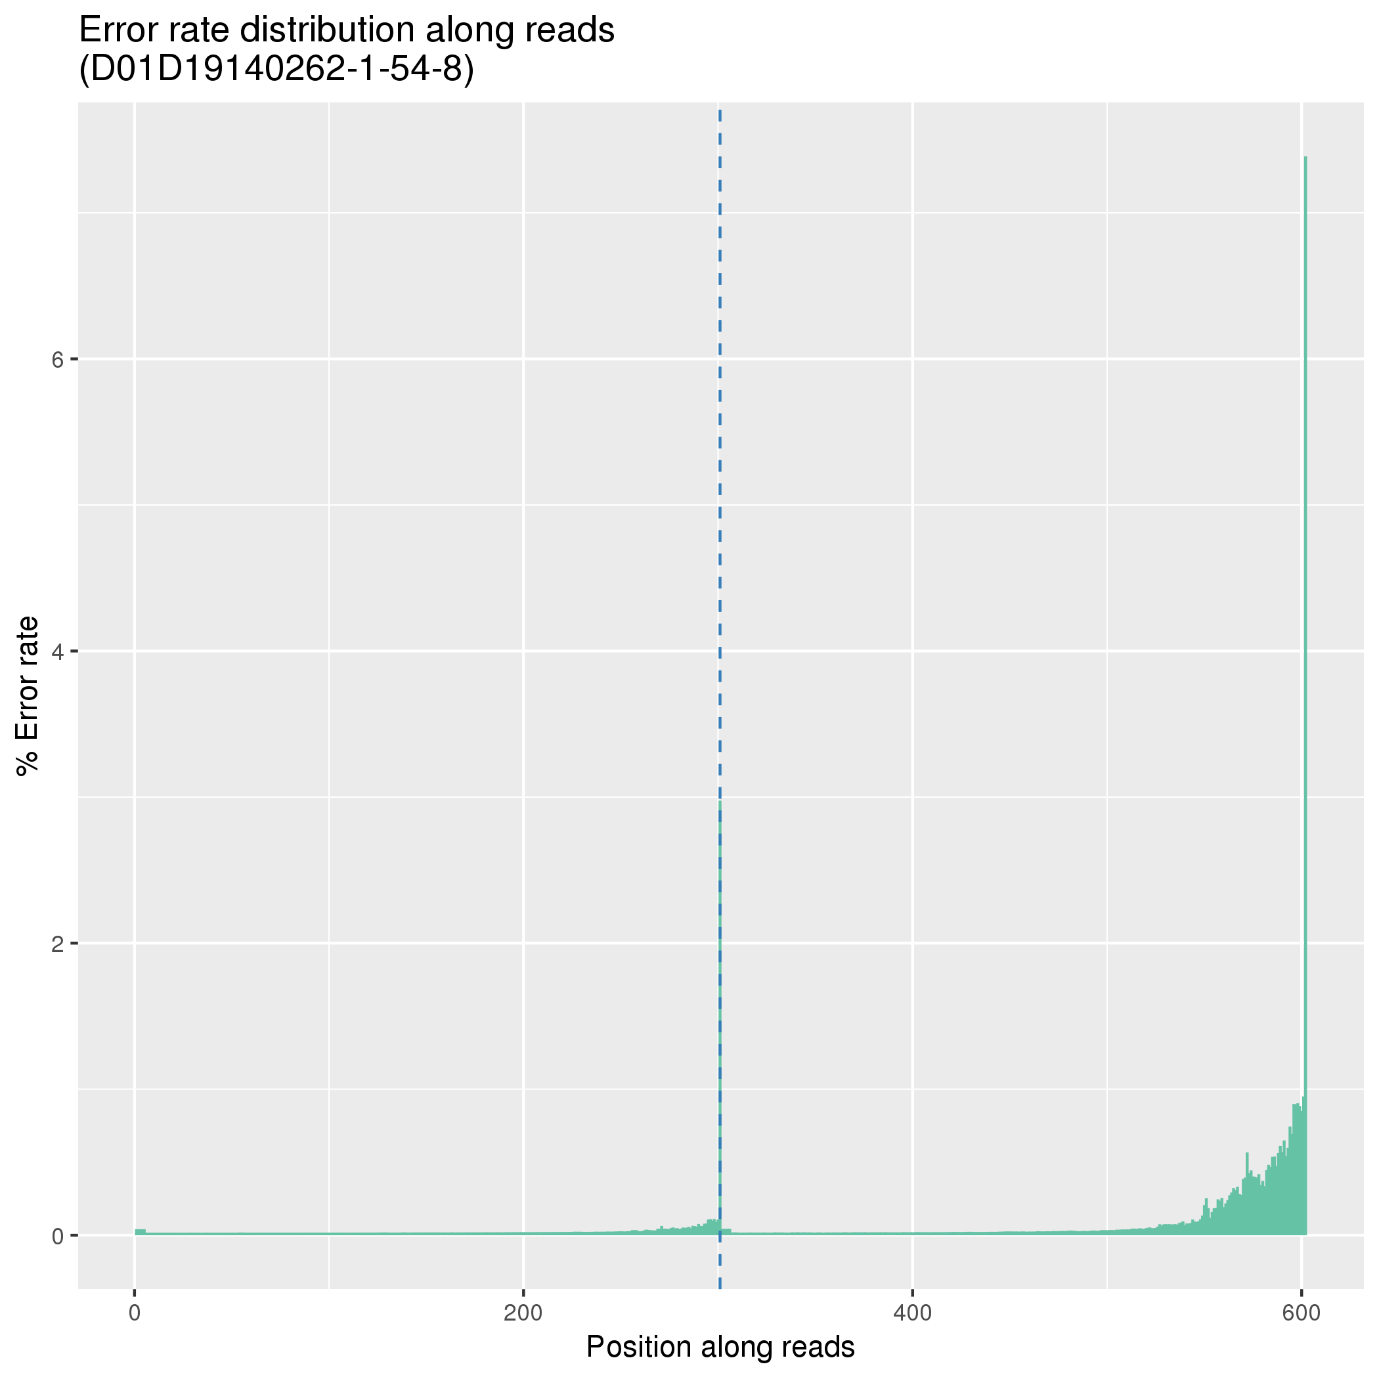


Figure S1: The error rate distribution along reads of the data.


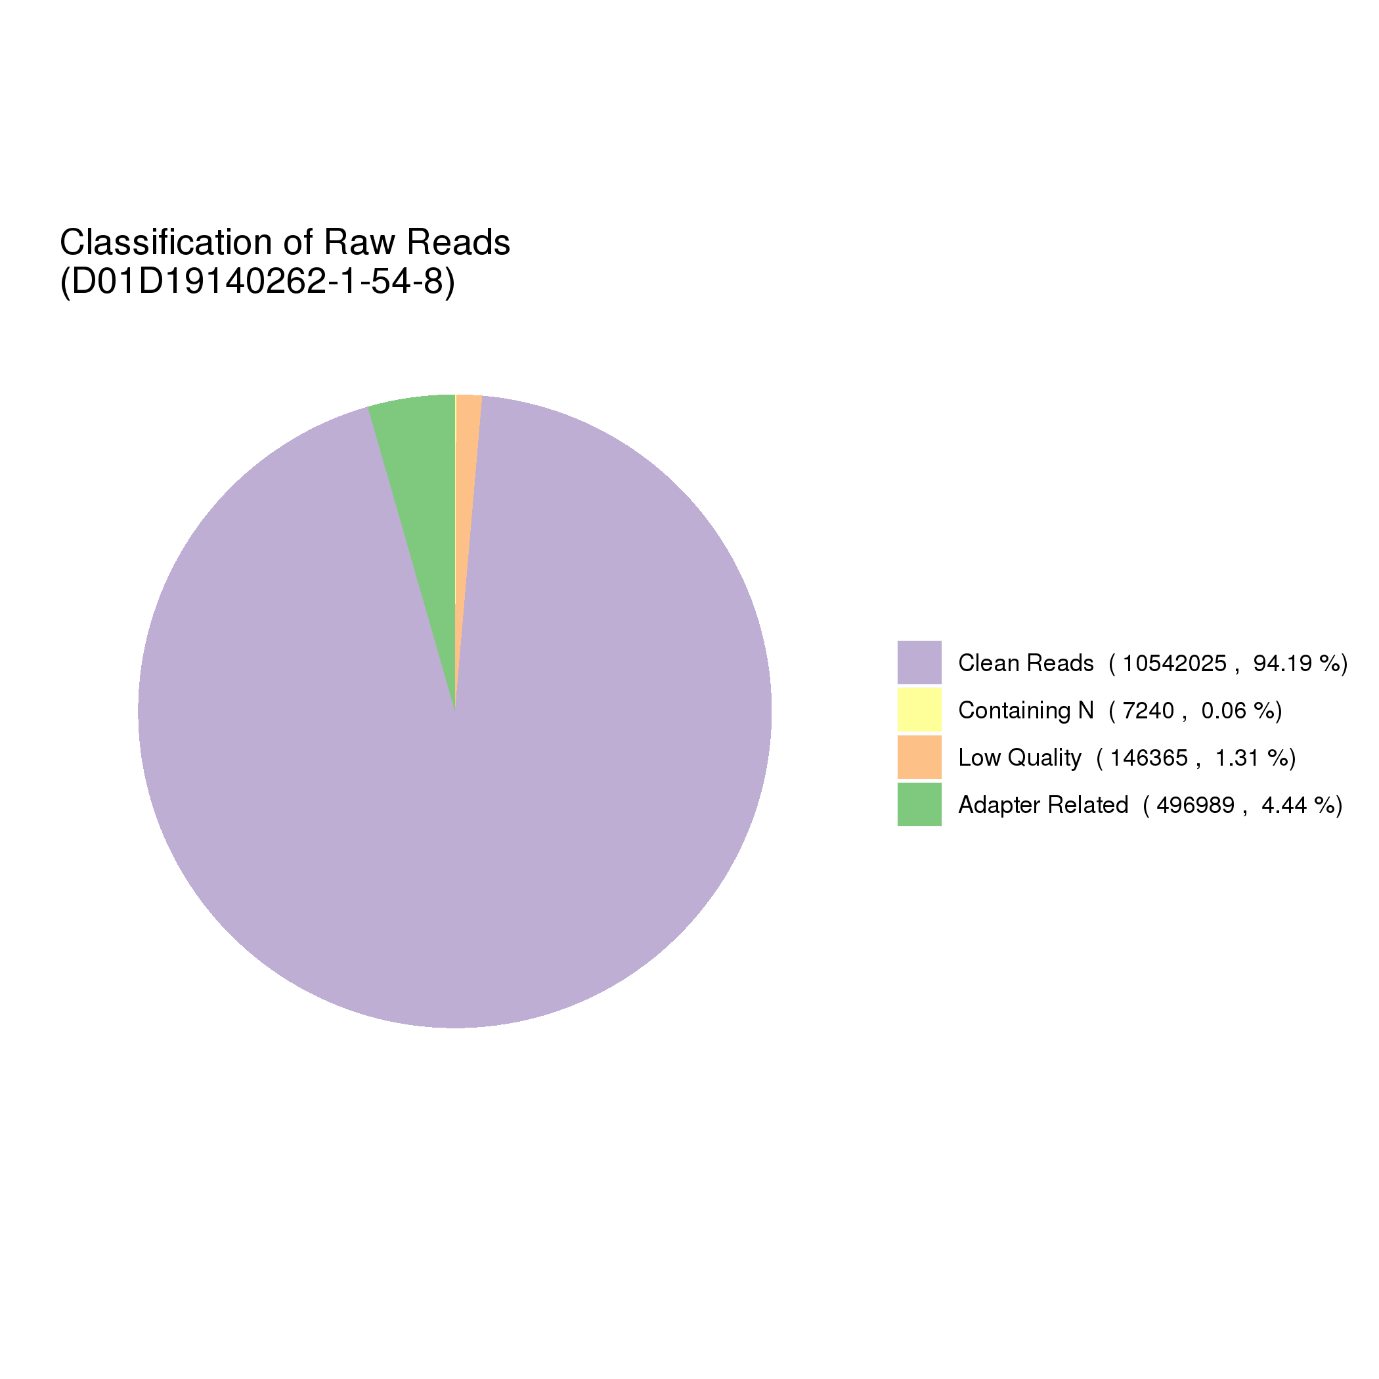

Figure S2: The classification of Raw Reads.


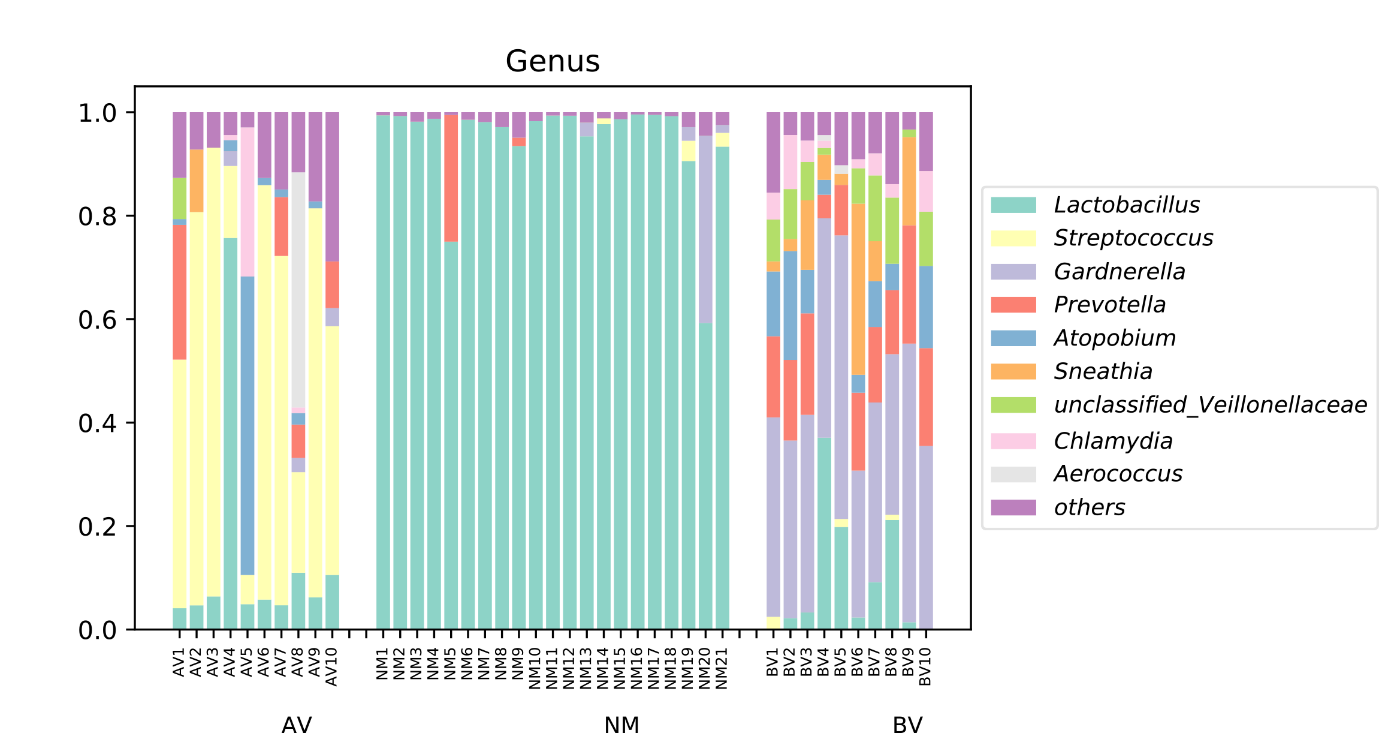

Figure S3: The abundance of genus for each sample in AV, NM and BV.


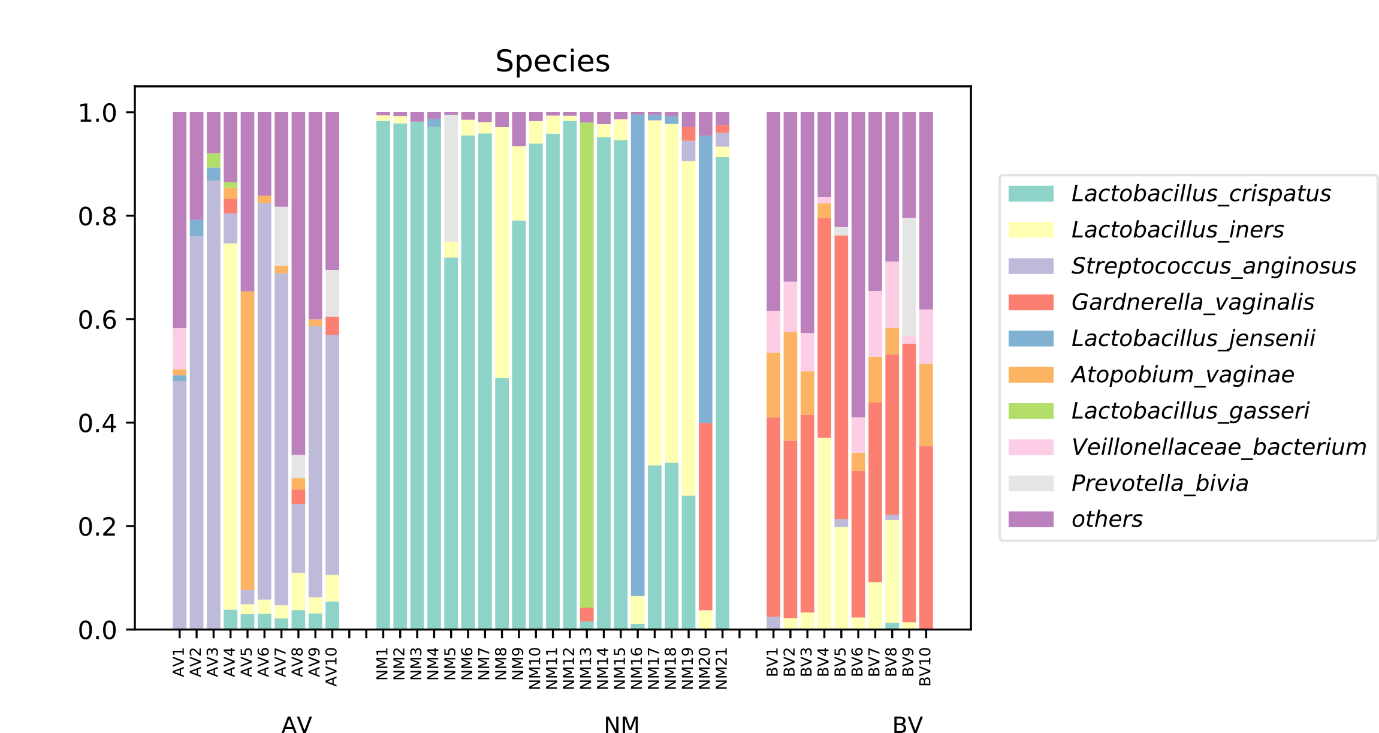


Figure S4: The abundance of species for each sample in AV, NM and BV.


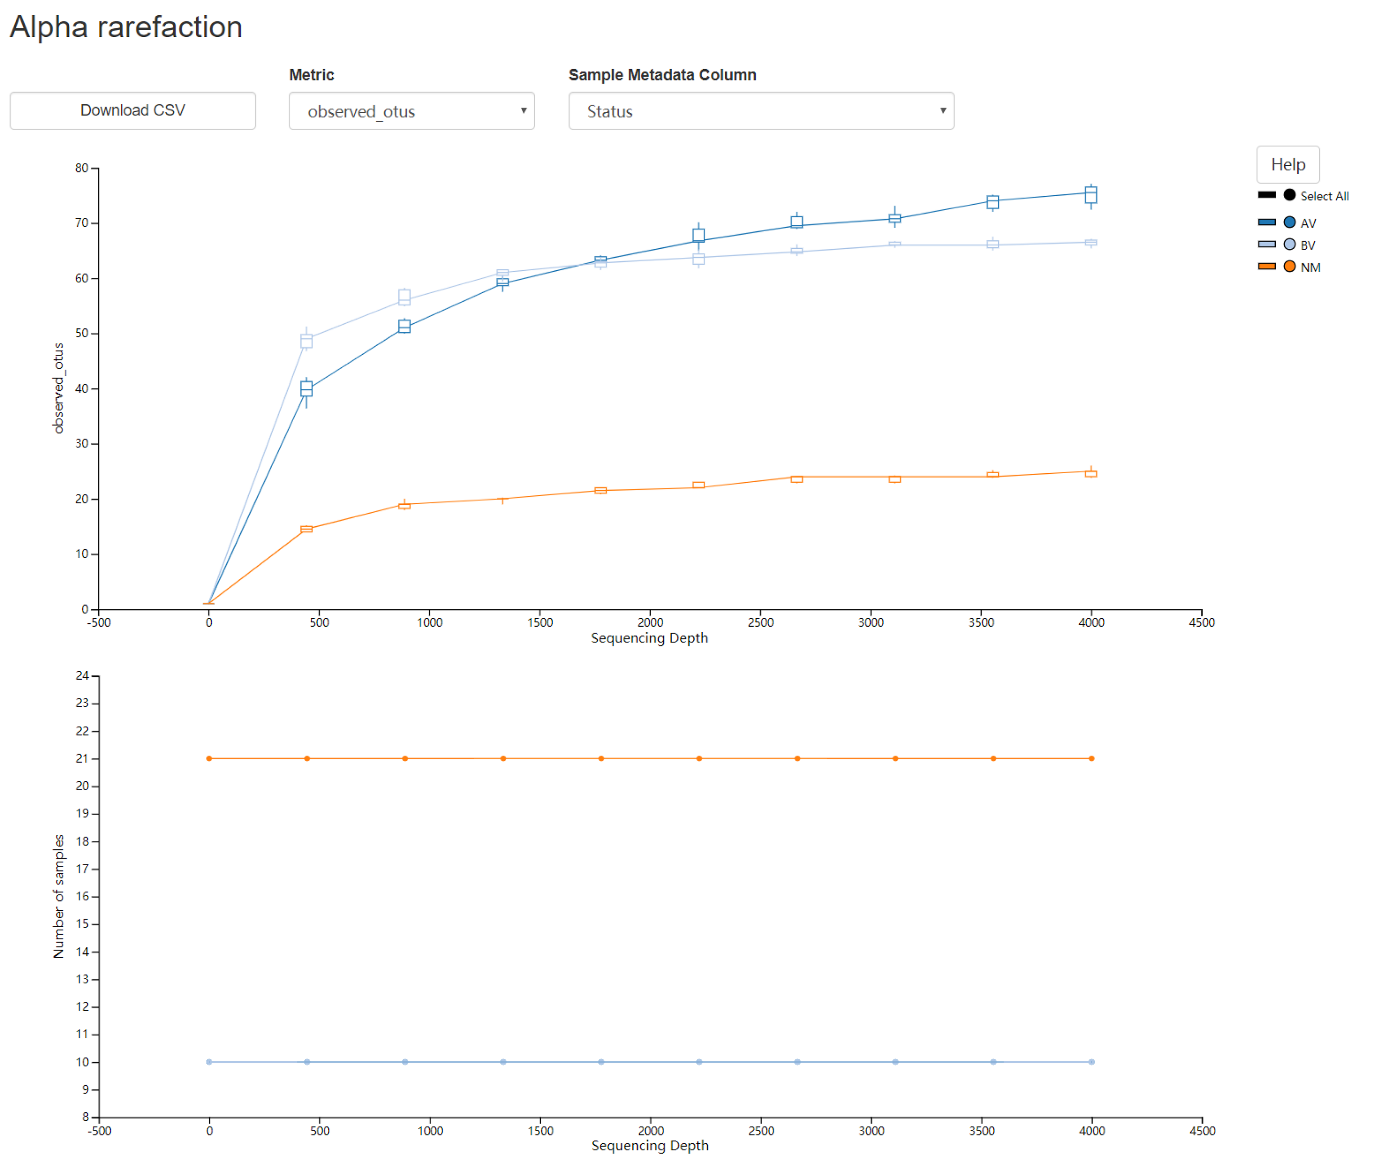

Figure S5: The rarefaction analysis of all samples.


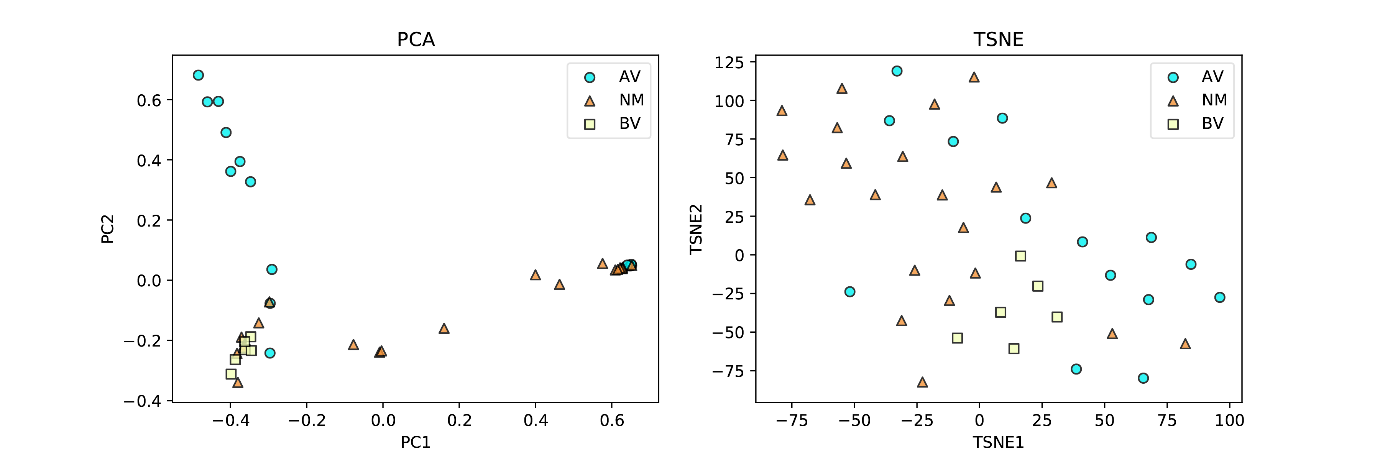


Figure S6: Cluster of AV, NM, and BV samples.


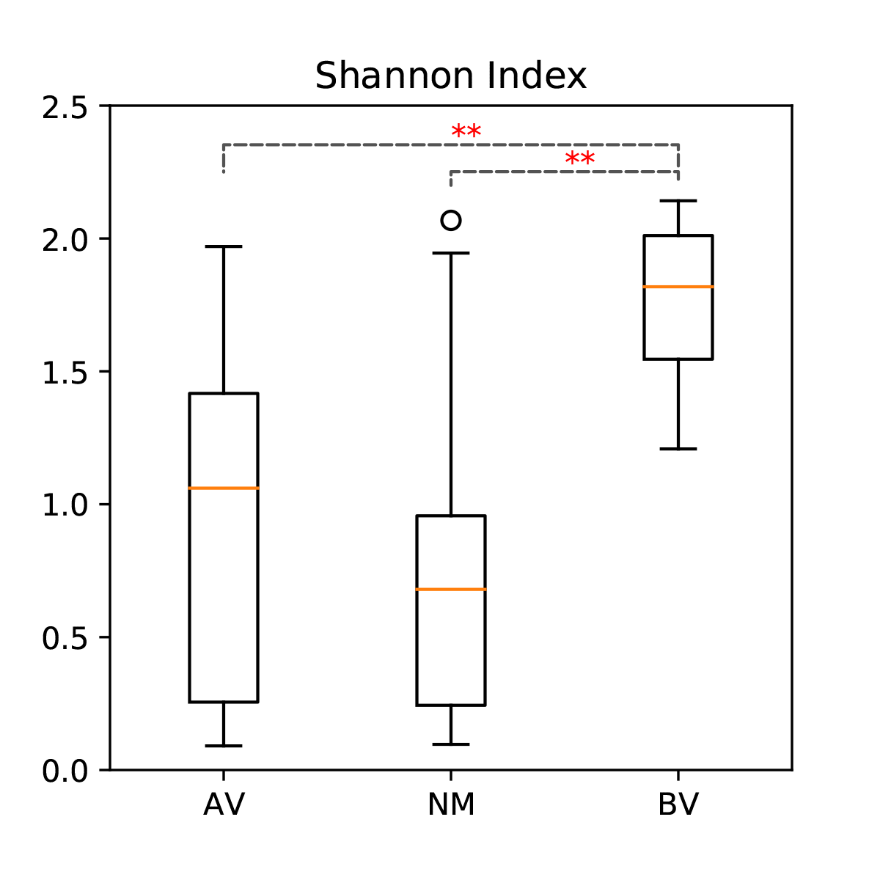


Figure S7: The comparison of Shannon index plot of AV, NM and BV samples. **P<0.01.


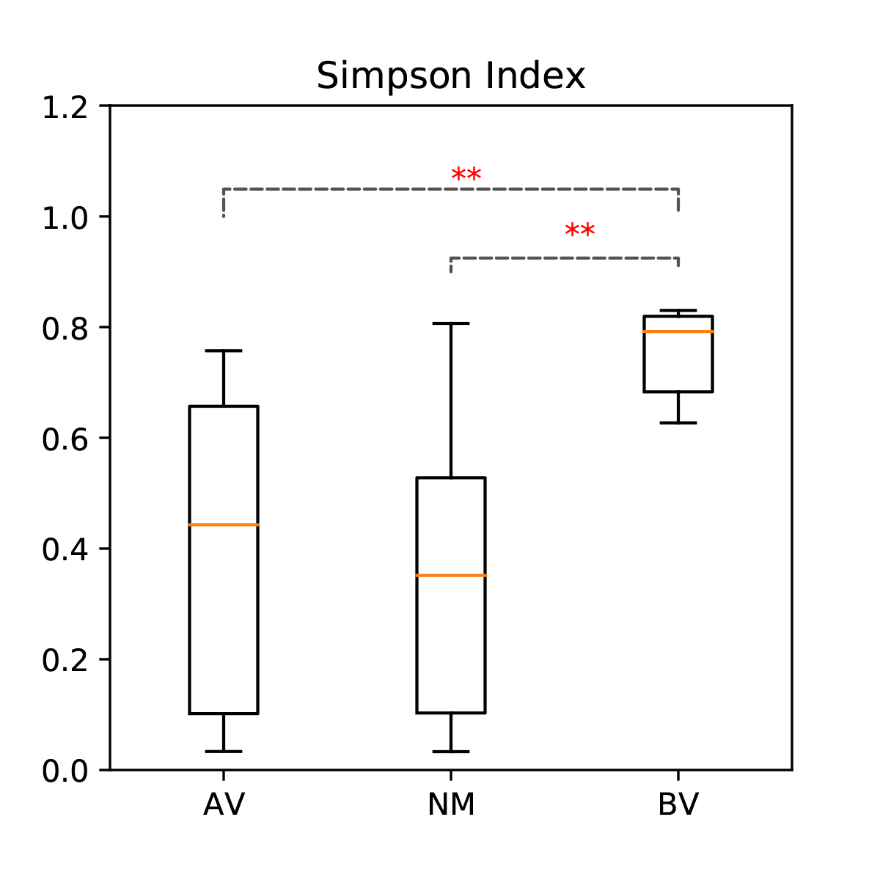


Figure S8: The comparison of Simpson index plot of AV, NM and BV samples. **P<0.01.
